# Supplementary material
Source: PubMed Central journal article supplement (PMC6172461)
Supplement: EMBR-19-e45494-s001.pdf [file EMBR-19-e45494-s001.pdf]

# APPENDIX

for

## **Telomeric epigenetic response mediated by Gadd45a regulates stem cell aging and lifespan**

Daojun Diao#, Hu Wang#, Tangliang Li#, Zhencan Shi, Xiaoqing Jin, Tobias Sperka, Xudong Zhu, Meimei Zhang, Fan Yang, Yusheng Cong, Li Shen, Qimin Zhan, Jing Yan, Zhangfa Song and Zhenyu Ju

### **Table of Contents**

|                    |          |
|--------------------|----------|
| Appendix Figure S1 | Page 2   |
| Appendix Figure S2 | Page 3   |
| Appendix Figure S3 | Page 4   |
| Appendix Figure S4 | Page 5   |
| Appendix Figure S5 | Page 6   |
| Appendix Figure S6 | Page 7-8 |
| Appendix Table S1  | Page 9   |

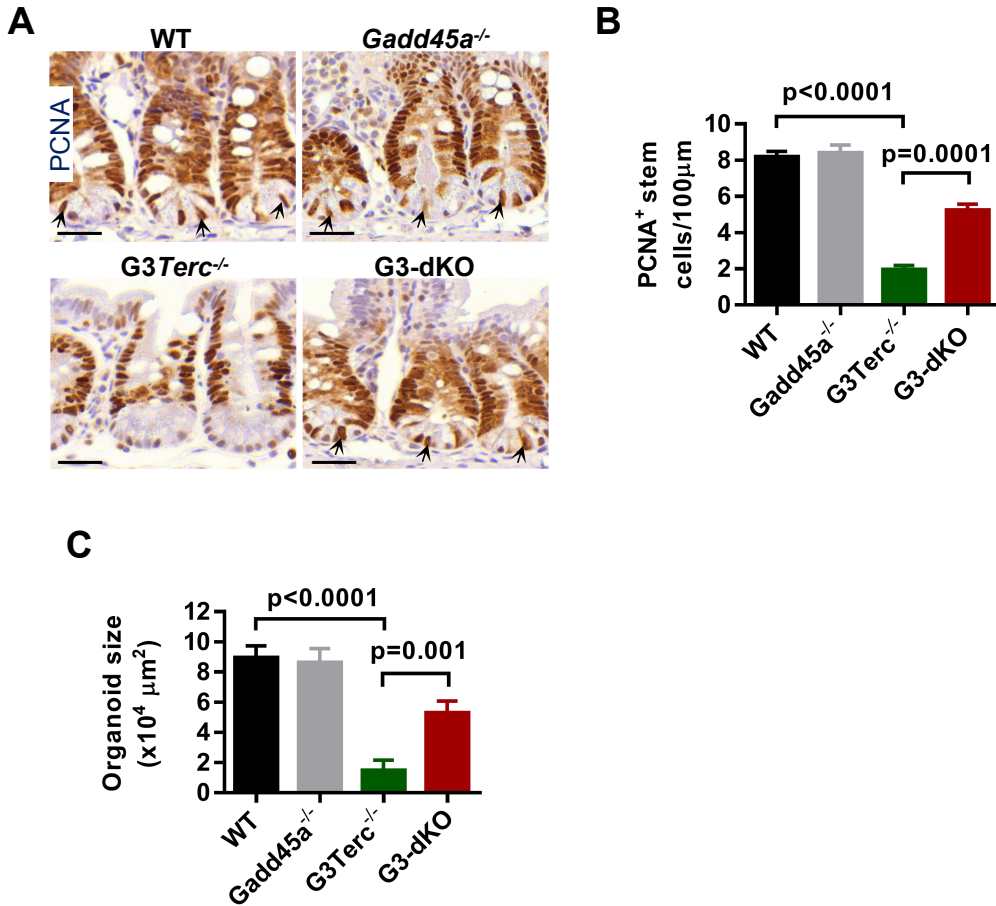

**Appendix Figure S1. *Gadd45a* deletion improves intestinal stem cell maintenance and function in *G3Terc*<sup>-/-</sup> mice.**

(A) Representative images of PCNA antibody staining indicating the intestine stem cells (ISC, arrows) at the bottom of small intestine crypts.

(B) Quantification of PCNA positive ISCs per 100 µm of small intestines (n=4-5 mice/group).

(C) The size of organoids on day 8 of culture (n=4-5 mice per genotype). Note: Scale bars represent 25 µm for Appendix Fig. S1A. Data are presented as mean ± s.e.m.

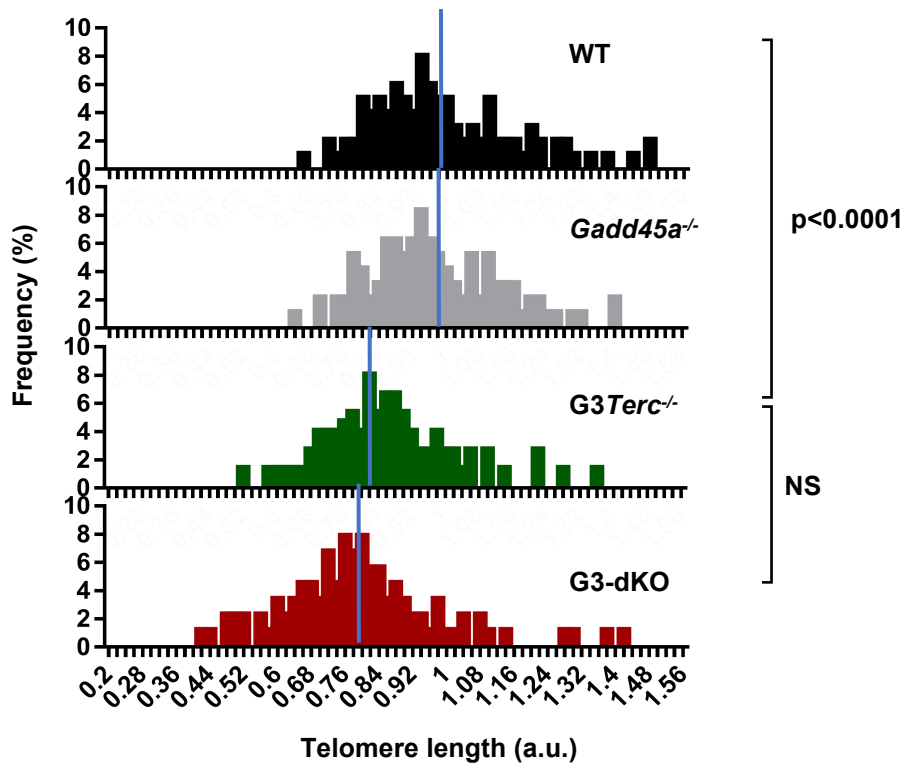

***Appendix Figure S2. Gadd45a deficiency does not elongate telomere length in G3Terc<sup>-/-</sup> mice.***

Telomere length profile represented by telomere signal intensity (200 cells per genotype were counted, n=4 mice per genotype; a.u., arbitrary units).

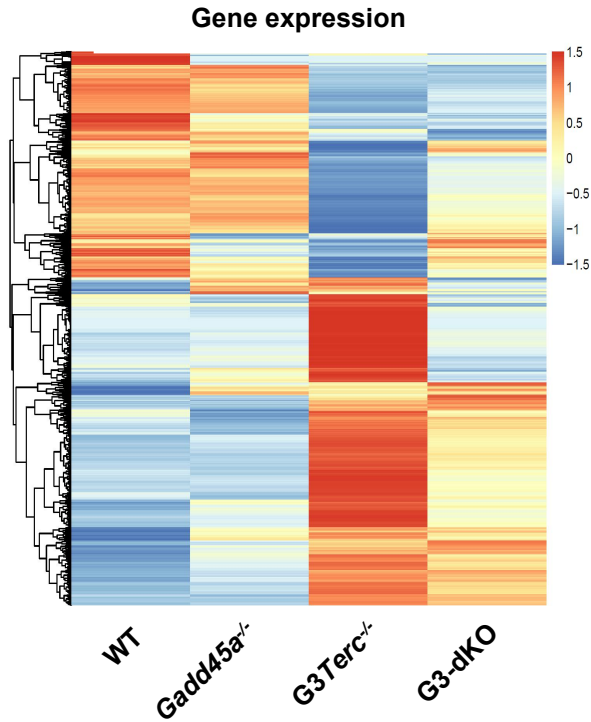

***Appendix Figure S3. Gadd45a deletion partially reverses telomere dysfunction induced transcriptional changes.***

Heatmap shows gene expression profiles from MEFs with indicated genotypes. Red and blue colours depict high and low gene expression levels, respectively, based on the log<sub>2</sub> P-values of their RPKMs.

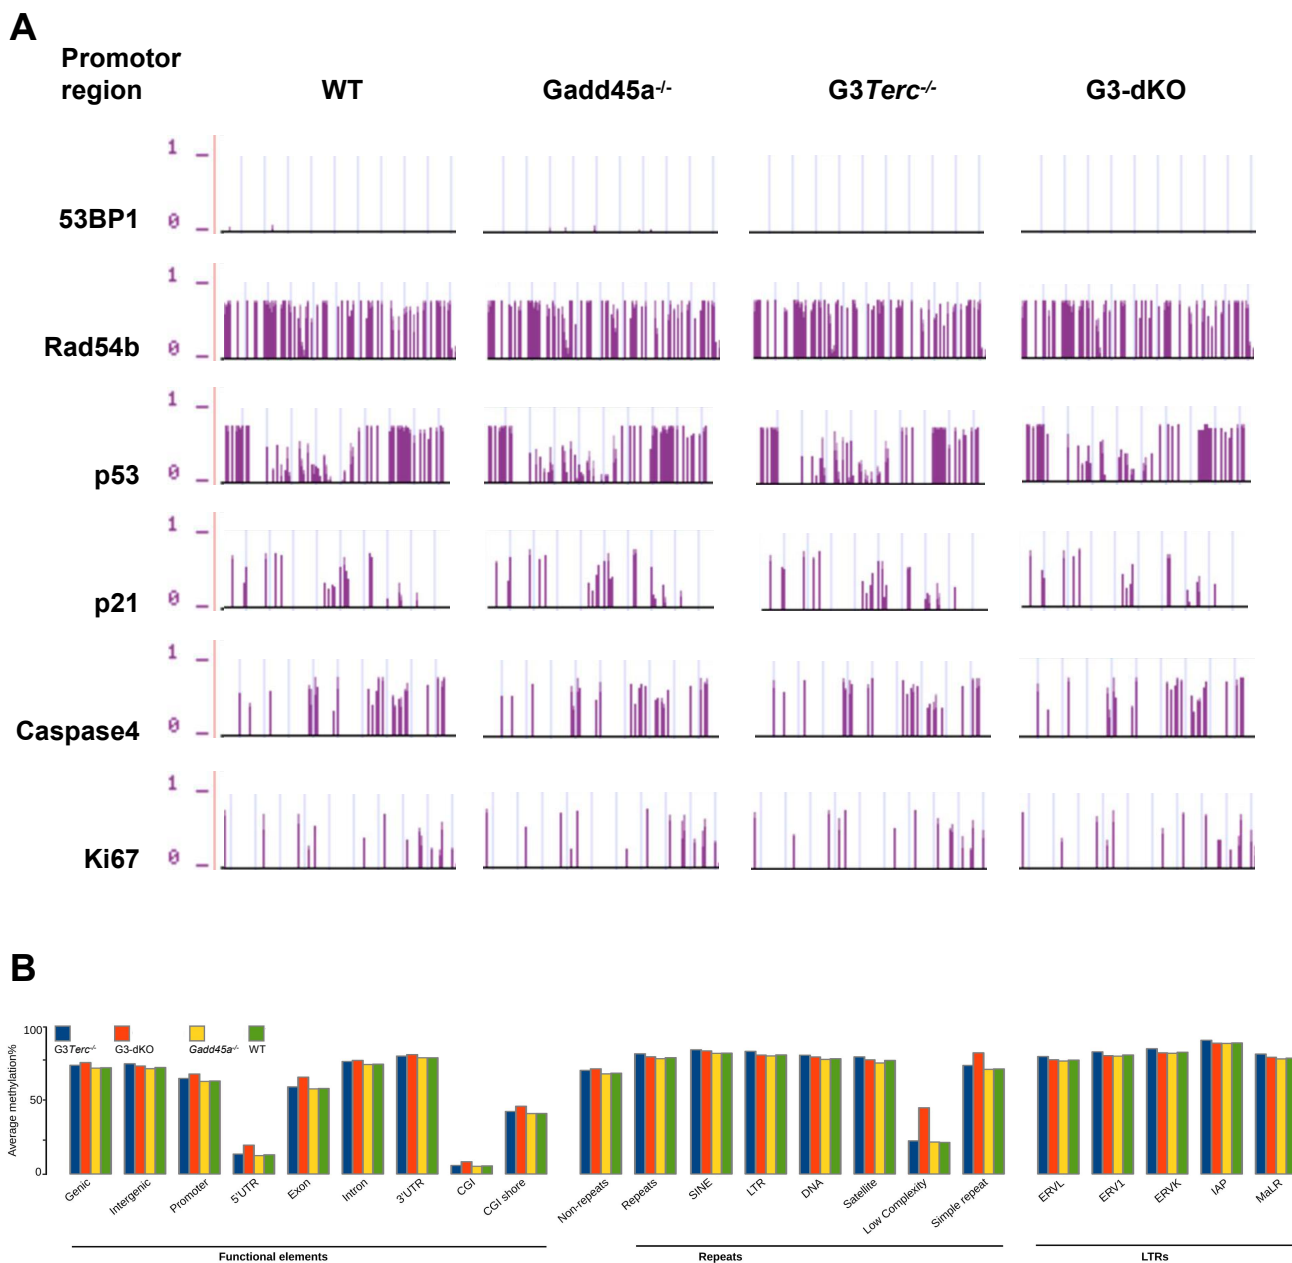

**Appendix Figure S4. *Gadd45a* deficiency does not change DNA methylation in the promoter region of DDR related genes.**

(A) The DNA methylation level in the promoter region of DDR related genes in MEF cells with indicated genotypes.

(B) The DNA methylation status of non-telomeric repetitive elements.

**A**

Mouse Chr1: 195341504-195341845 (mm10)

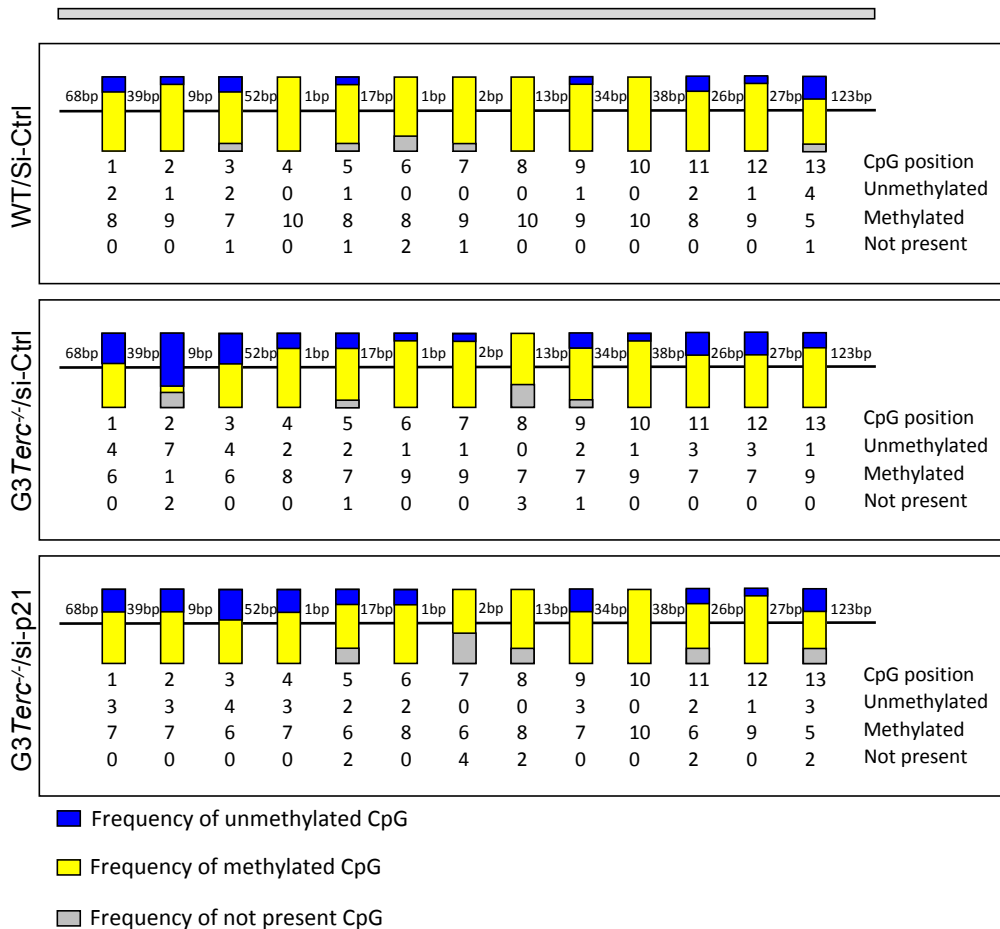**B**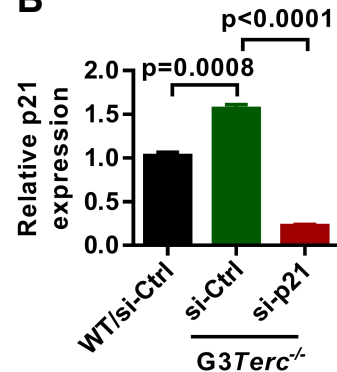

**Appendix Figure S5. p21 knockdown does not change DNA methylation in the subtelomeric region of *G3Terc*<sup>-/-</sup> mice.**

(A) The methylation status of CpG island in subtelomeric regions on chromosome 1q. gDNAs from MEF cells treated with and without p21 siRNA were PCR amplified and analysed by bisulfite sequencing. Yellow and blue bars indicate the frequencies of methylated and unmethylated CpG islands, respectively, at each position.

(B) Efficiency of p21 silence by siRNA in *G3Terc*<sup>-/-</sup> MEF cells.

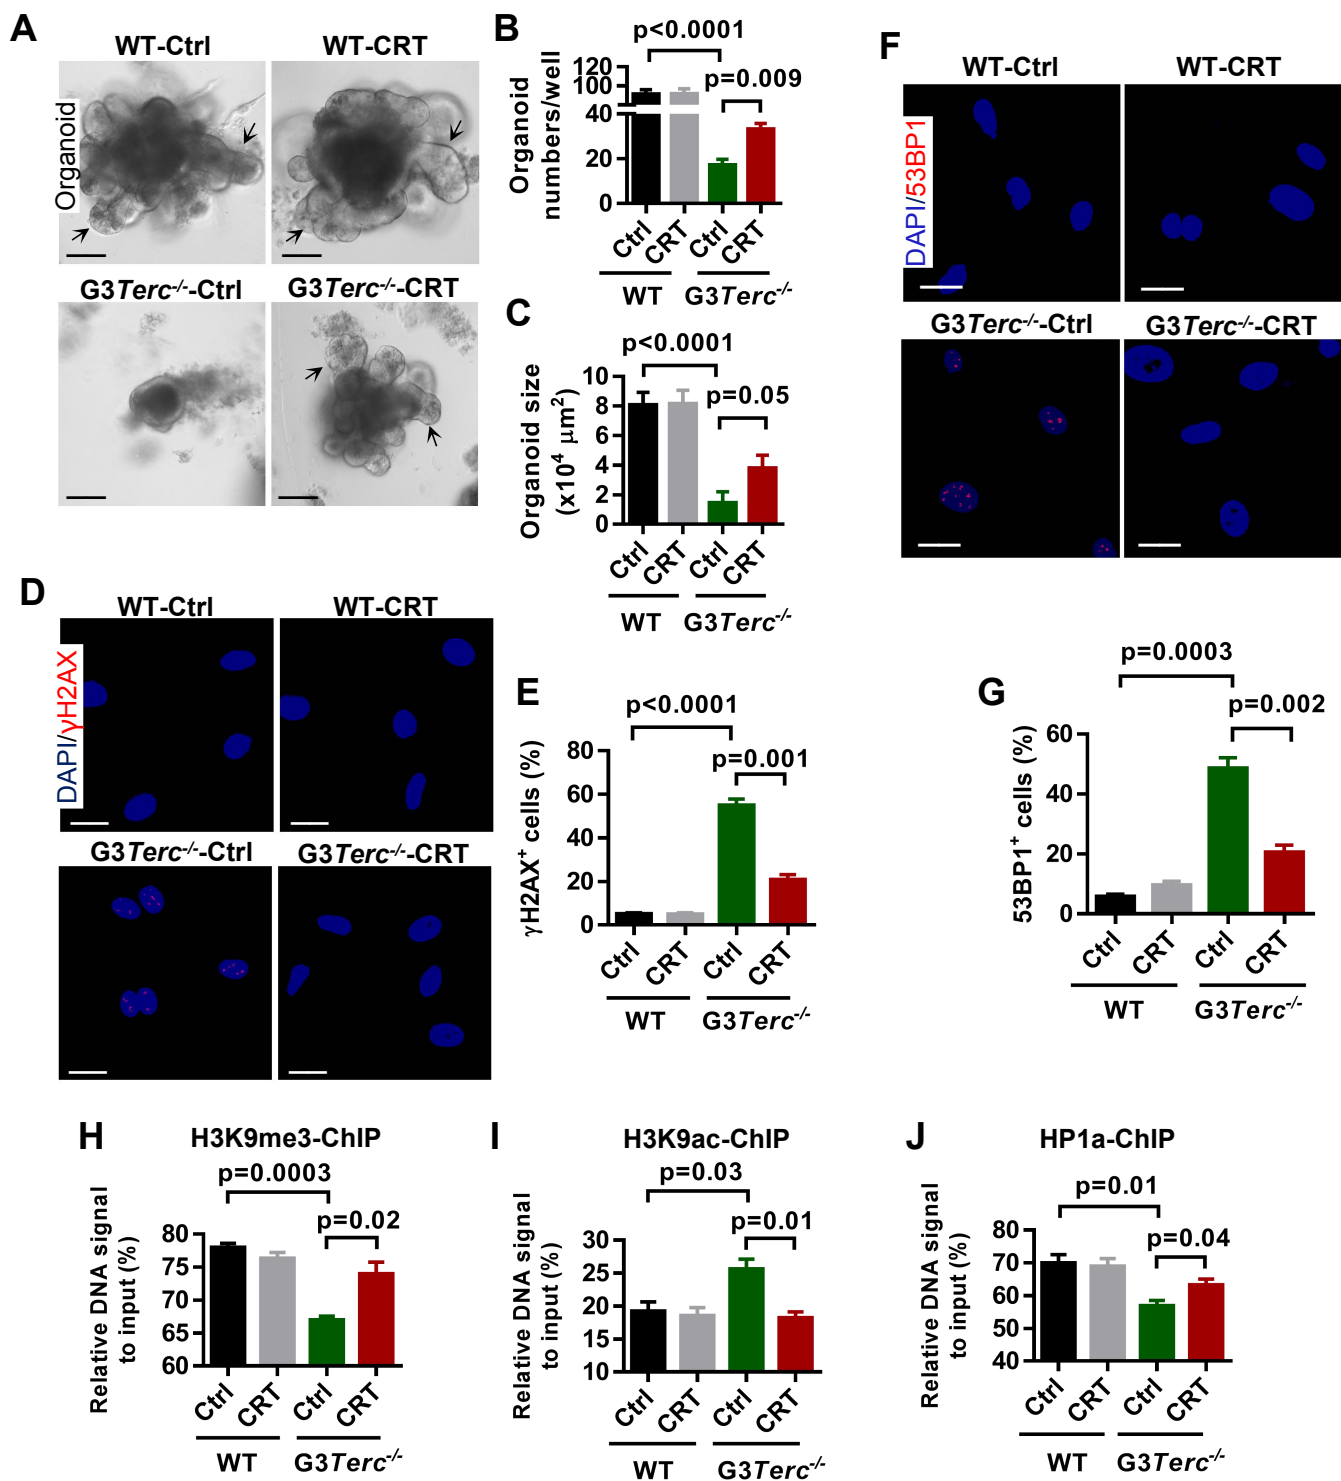

**Appendix Figure S6. APE1 inhibition rescues intestine stem cell impairment in G3Terc<sup>-/-</sup> mice.**

(A) Representative images of small intestine organoids from WT and G3Terc<sup>-/-</sup> mice incubated with or without APE1 inhibitor (CRT0044876, 100μM) treatment. Arrows indicate the crypt-like structure in organoid cultures.

**(B-C)** Quantification of organoid number (per well) and size (in  $10^4 \mu\text{m}^2$ ) from crypt cultures (n=3-4 mice per genotype/treatment).

**(D)** Representative images of  $\gamma\text{H2AX}$  antibody staining on dissociated organoid cells from WT and *G3Terc<sup>-/-</sup>* organoid cultures with or without APE1 inhibitor (CRT0044876, 100 $\mu\text{M}$ ) (DNAs are stained with DAPI).

**(E)** Quantification of  $\gamma\text{H2AX}$  positive cells (n=3-4 mice per group).

**(F)** Representative images of 53BP1 antibody staining on dissociated organoid cells from WT and *G3Terc<sup>-/-</sup>* crypt cultures with or without APE1 inhibitor (CRT0044876, 100 $\mu\text{M}$ ) (DNAs were stained with DAPI).

**(G)** Quantification of 53BP1 positive cells (n=3-4 mice per group).

**(H-J)** Quantification of H3K9me3-ChIP (panel H), H3K9ac-ChIP (panel I), and HP1a-ChIP (panel J) values as percentage of the telomeric DNA levels, MEF cells were treated with or without APE1 inhibitor (CRT0044876, 100 $\mu\text{M}$ ) before CHIP assay.

Note: Scale bars represent 60  $\mu\text{m}$  for Appendix Fig. S6A and 5  $\mu\text{m}$  for Appendix Fig. S6D and F. Data are presented as mean  $\pm$  s.e.m.



|              | <b>Paraffin block No.</b> | <b>Patient No.</b> | <b>Gender</b> | <b>Age (y/o)</b> |
|--------------|---------------------------|--------------------|---------------|------------------|
| <b>Young</b> | 2892                      | 3247171            | male          | 30               |
|              | 2720                      | 3142790            | male          | 45               |
|              | 2865                      | 3220174            | male          | 45               |
|              | 2870                      | 3231739            | male          | 50               |
|              | 2783                      | 3178899            | female        | 33               |
|              | 2653                      | 3099630            | female        | 41               |
|              | 2893                      | 3242481            | female        | 44               |
|              | 2695                      | 3131473            | female        | 44               |
| <b>Old</b>   | 2708                      | 2023972            | male          | 85               |
|              | 2697                      | 3110981            | male          | 84               |
|              | 2639                      | 2021719            | male          | 82               |
|              | 2633                      | 3073271            | male          | 82               |
|              | 2730                      | 3147062            | female        | 82               |
|              | 2869                      | 3223800            | female        | 83               |
|              | 2657                      | 3085289            | female        | 84               |
|              | 2880                      | 3214092            | female        | 80               |

***Appendix Table S1. Source of human colon samples.***

Human colon samples were separated into young and old groups, each group contains 8 person which includes 4 male and 4 female.
